# Supplementary material for: Morphological evolution of MoxW1−xS2/MoS2 heterostructures modulated with a growth dynamic process by one-step chemical vapor deposition
Source: Royal Society of Chemistry journal article supplement (doi:10.1039/d4ce00462k), 2024-01-01
Supplement: d4ce00462k1.pdf [file d4ce00462k1.pdf]

## Supporting information

# Morphological Evolution of $\text{Mo}_x\text{W}_{1-x}\text{S}_2/\text{MoS}_2$ Heterostructures Modulated with Growth Dynamic Process by One-step Chemical Vapor Deposition

Zi-Qiao Li,<sup>†</sup> Qi-Bo Wang,<sup>†</sup> Qin-Qin Xu,<sup>\*</sup> Zhen-Hua Han, Tong Cheng, Jian-Zhong Yin

*State Key Laboratory of Fine Chemicals, School of Chemical*

*Engineering, Dalian University of Technology, 2 Ling Gong Road,*

*116024, Dalian, China*

Table S1 Precursor quantity with different Mo:W

| Mo:W | $\text{Na}_2\text{MoO}_4 \cdot 2\text{H}_2\text{O}$ (mg) | $\text{Na}_2\text{WO}_4 \cdot 2\text{H}_2\text{O}$ (mg) |
|------|----------------------------------------------------------|---------------------------------------------------------|
| 10:1 | 33.0                                                     | 4.5                                                     |
| 2:1  | 24.2                                                     | 16.5                                                    |
| 1:2  | 12.1                                                     | 33.0                                                    |
| 1:10 | 3.3                                                      | 45.0                                                    |

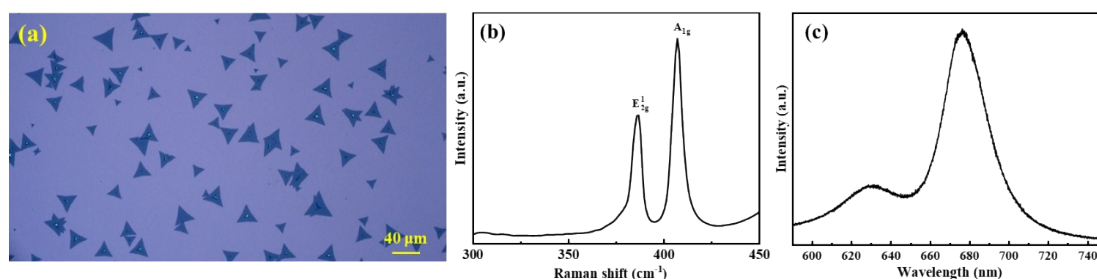

Fig. S1 (a) OM image, (b) Raman spectrum, and (c) PL spectrum of  $\text{MoS}_2$  grown by  $\text{Na}_2\text{MoO}_4$  solution

The Raman peak positions of  $\text{MoS}_2$  are  $386.8 \text{ cm}^{-1}$  and  $407.1 \text{ cm}^{-1}$ , respectively, the relative distance of the two peaks is  $20.3 \text{ cm}^{-1}$  (see Fig.S1(b)). The result is in good agreement with the monolayer  $\text{MoS}_2$  grown based on VLS.<sup>1</sup> In addition, according to Fig.S1(c), the main PL

peak of MoS<sub>2</sub> is 673 nm, corresponding to direct band gap of 1.84 eV.

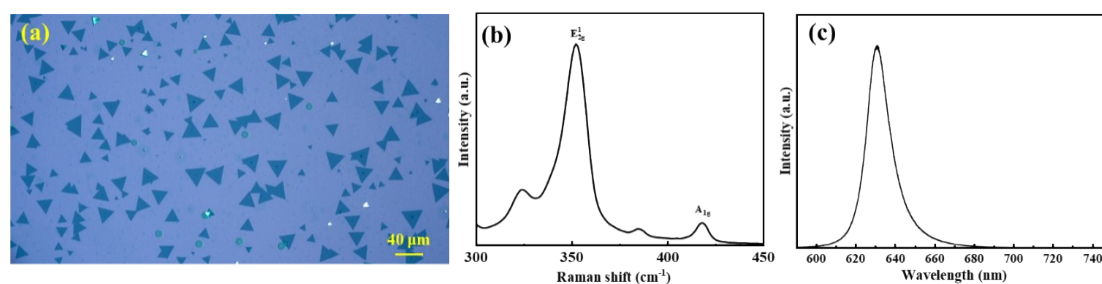

Fig. S2 (a) OM image, (b) Raman spectrum, and (c) PL spectrum of WS<sub>2</sub> grown by Na<sub>2</sub>WO<sub>4</sub> solution

The in-plane vibration peak ( $E_{2g}^1$ ) of WS<sub>2</sub> is 351 cm<sup>-1</sup>, while the out-of-plane vibration peak ( $A_{1g}$ ) is 416 cm<sup>-1</sup> in Fig.S2(b), and the frequency difference between the two vibration peaks is shown to be ~65 cm<sup>-1</sup>. This result indicates that it is monolayer of WS<sub>2</sub>.<sup>2</sup> In Fig. S2(c), the PL peak of WS<sub>2</sub> is 630 nm and its band gap is 1.97 eV.

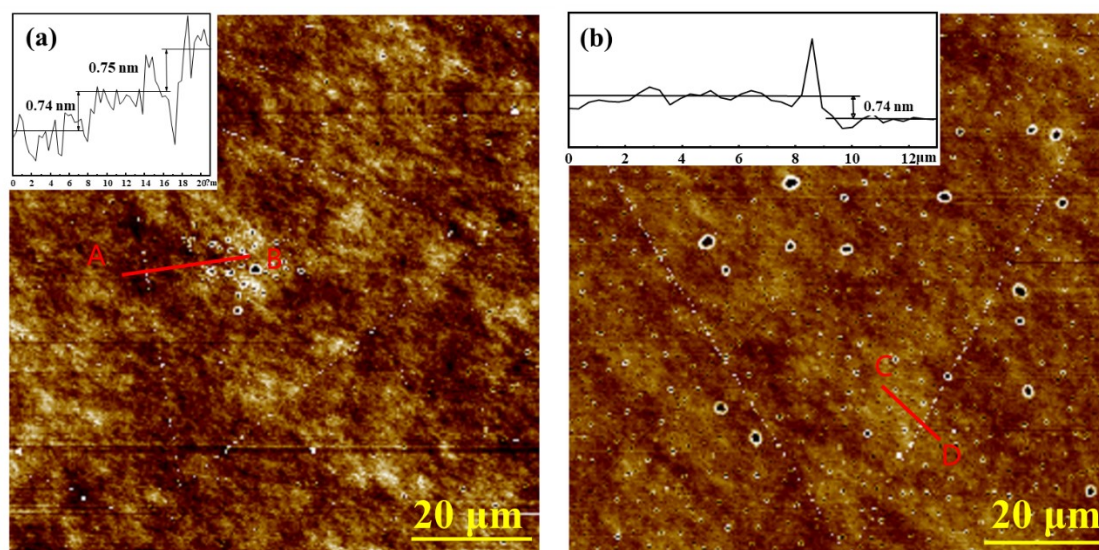

Fig. S3 AFM morphology and thickness of the heterostructure at Mo:W of (a) 2:1 and (b) 1:2

## References

- S1. Chen Long, Lingyu Zang, Luhua Chen, Jinchao Wu, Chengming Jiang and Jinhui Song, *CRYSTENGCOMM*, 2021, **23**, 5337-5344.
- S2. Hang Liu, Guopeng Qi, Caisheng Tang, Maolin Chen, Yang Chen, Zhiwen Shu, Haiyan Xiang, Yuanyuan Jin, Shanshan Wang, Huimin Li, Miray Ouzounian, Travis Shihao Hu, Huigao Duan, Shisheng Li, Zheng Han and Song Liu, *ACS APPL MATER INTER*, 2020, **12**, 13174-13181.
